# Supplementary material for: A europium ion doped WO3 film with the bi-functionality of enhanced electrochromic switching and tunable red emission
Source: Royal Society of Chemistry journal article supplement (doi:10.1039/c7tc00248c), 2017-01-01
Supplement: c7tc00248c1.pdf [file c7tc00248c1.pdf]

# **Europium ions doped WO<sub>3</sub> film with bi-function of enhanced electrochromic switching and tunable red emission**

**Gui Luo, Luying Shen, Jianming Zheng, Chunye Xu**

*Hefei National Laboratory for Physical Sciences at the Microscale, CAS Key Laboratory of Soft Matter Chemistry, Department of Polymer Science and Engineering, University of Science and Technology of China, Hefei 230026, PR China*

\*Corresponding Author:

\*E-mail: [chunye@ustc.edu.cn](mailto:chunye@ustc.edu.cn)

Tel & Fax: +86-551-6360-3459

Website: <http://www.hfnl.ustc.edu.cn/2010/0819/954.html>

Address: Hefei National Laboratory for Physical Sciences at the Microscale, CAS Key Laboratory of Soft Matter Chemistry, Department of Polymer Science and Engineering, University of Science and Technology of China, Hefei, 230026, P. R. China

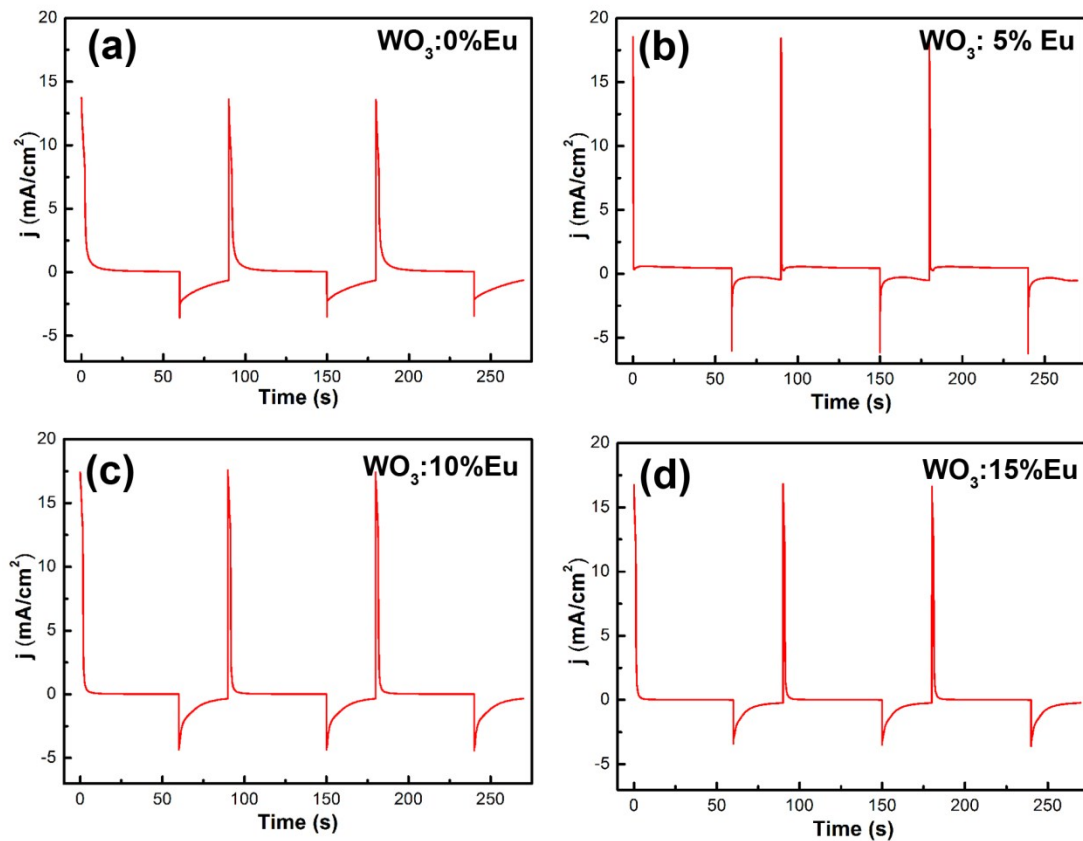

**Fig. S1** double-step chronoamperometry curves of  $\text{WO}_3:\text{xEu}$  (x=0, 5%, 10%, 15%) films measured in 0.5 M  $\text{H}_2\text{SO}_4$  aqueous electrolyte.

To characterize the charge capacity of all films in EC switching process, all the films were colored under -1 V in 0.5 M  $\text{H}_2\text{SO}_4$  electrolyte for 20 s and then bleached at 1.5 V for 20 s by using double-step chronoamperometry technique. The integral area between chronoamperometry curve and Y axis represents the charge capacity. The charge capacity for  $\text{WO}_3:\text{xEu}$  (x=0, 5%, 10%, 15%) films in coloration process are calculated to be 34.68 mC, 4.16 mC, 18.73 mC and 17.05 mC, respectively.

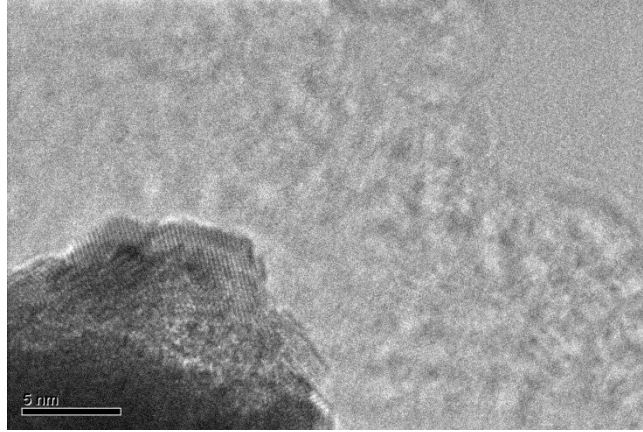

**Fig. S2** High resolution TEM graph of WO<sub>3</sub>: 10% Eu film.

To characterize the structure of WO<sub>3</sub>: 10% Eu film, TEM graph at high resolution is collected and shown in Fig. S2. It can be seen that the nanoparticle shows poor crystallinity, indicating its amorphous structure.
